# Supplementary material for: In vivo quantification of anterior and posterior chamber volumes in mice: implications for aqueous humor dynamics
Source: PubMed Central journal article supplement (PMC11291131; doi:10.1101/2024.07.24.604989), 2024-07-25
Supplement: NIHPP2024.07.24.604989v1-supplement-1.pdf [file NIHPP2024.07.24.604989v1-supplement-1.pdf]

## 650 Supplemental Text

651 *Vis-OCT imaging system:* Light from a supercontinuum laser (SuperK EXTREME, NKT  
652 Photonics) was filtered using a dichroic mirror (DMSP650, Thorlabs), spectral shaping filter (34-  
653 443, Edmund Optics), and bandpass filter (FF02-694/SP-25, Semrock) before being sent to a  
654 90:10 fiber coupler (TW560R2A2, Thorlabs). The reference arm consisted of polarization  
655 controllers (FPC560, Thorlabs) and BK7 dispersion compensation glass (27-852, Edmund  
656 Optics). Light in the sample arm was scanned using a pair of galvanometer mirrors (Compact-  
657 506, ScannerMax) through a 25 mm achromatic doublet scan lens (AC127-025-A, Thorlabs).  
658 The light from the scan lens was focused on the sample. Reflected light from the sample arm and  
659 the light transmitted through the reference arm was coupled to a second 50:50 fiber coupler  
660 (TW560R2F2, Thorlabs). Two spectrometers (Blizzard SR, Opticent Health) operating from 510  
661 nm to 610 nm detected the interferogram signals propagating through the second fiber coupler  
662 for image reconstruction. We used two spectrometers for balanced detection to eliminate the  
663 influences of relative intensity noise<sup>54</sup>. The axial resolution of the system is  $1.3 \mu\text{m}$ <sup>24</sup>, and the  
664 lateral resolution is  $8.8 \mu\text{m}$  as measured with a USAF51 target card (R1DS1P, Thorlabs). The  
665 vis-OCT's A-line rate was 75 kHz, and the illumination power on the sample was 0.8 mW.

666 *Fusion of individual volumes into a composite volume:* A total of eight transformations were  
667 obtained from the eight vis-OCT sub-volumes. Using these transformations, we mapped the  
668 coordinate system of all volumes to the coordinate system of the first acquired vis-OCT volume  
669 (Fig. 2d). For vis-OCT volumes not adjacent to the first volume, the transformation matrices for  
670 each volume between the given volume and the first volume can be multiplied to determine the  
671 net transformation of the given volume to the first volume. Specifically, given the transformation  
672  $T_i$  mapping volume  $i$  onto the reference coordinate system, coordinate  $(x_i, y_i, z_i)$  in the reference  
673 frame of the volume is mapped to  $(x', y', z')$  in the reference coordinate system by

$$674 \quad T_i(x_i, y_i, z_i) = \begin{bmatrix} r_{11} & r_{12} & r_{13} & t_x \\ r_{21} & r_{22} & r_{23} & t_y \\ r_{31} & r_{32} & r_{33} & t_z \\ 0 & 0 & 0 & 1 \end{bmatrix} \begin{bmatrix} x_i \\ y_i \\ z_i \\ 1 \end{bmatrix} = \begin{bmatrix} x' \\ y' \\ z' \\ 1 \end{bmatrix}. \quad \text{Eq. 1}$$

675 After mapping all eight volumes onto a common reference frame, we identified the  
676 overlapping regions between each adjacent volume pair. Next, we applied an iterative closest  
677 point (ICP) algorithm to refine the transformation of each volume to the common reference  
678 frame<sup>55</sup>. Specifically, we used ICP to minimize the distance between the point clouds of

679 overlapping regions of adjacent volumes. The purpose of the refinement step was to increase the  
 680 number of points used to register adjacent volumes and to address the loop closure problem<sup>31</sup>,  
 681 which results from the error propagating from the multiplication of multiple transformation  
 682 matrices. After refining the transformation, we defined the intensity of the reconstructed signal in  
 683 the global reference frame  $V(x',y',z')$  as

$$684 \quad T_i(x_i, y_i, z_i) = \begin{bmatrix} x' \\ y' \\ z' \\ 1 \end{bmatrix} \Rightarrow V(x', y', z') = I(x_i, y_i, z_i). \quad \text{Eq. 2}$$

685 In other words, if  $T_i$  maps  $(x_i, y_i, z_i)$  in the original reference frame of volume  $i$  to  $(x', y', z')$ , then  
 686 the intensity of the reconstructed signal  $V(x', y', z')$  is that of  $I(x_i, y_i, z_i)$  in the original reference  
 687 frame of volume  $i$ . For situations in where the mapped pixel was shared between two adjacent  
 688 scans, i.e. in which  $T_i$  maps  $(x_i, y_i, z_i)$  to  $(x', y', z')$  and  $T_j$  maps  $(x_j, y_j, z_j)$  to the same  $(x', y', z')$ , we  
 689 assigned  $V(x', y', z')$  as  $\max\{I(x_i, y_i, z_i)$  in the reference frame of volume  $i$ ,  $I(x_j, y_j, z_j)$  in the reference  
 690 frame of volume  $j\}$ .

691 *Determination of the approximate anterior hyaloid membrane location:* First, we identified the  
 692 inner boundaries of the anterior and posterior chambers (Fig. 4a) which coincided with the  
 693 anterior boundary of the lens (Fig. 4b). Next, we fit an ellipsoid to the lens boundary by  
 694 minimizing the least-squared error (LSE)

$$695 \quad LSE = \sum_{i=1}^n (Ax_i^2 + By_i^2 + Cz_i^2 + Dx_iy_i + Ex_iz_i + Fy_iz_i + Gx_i + Hy_i + Iz_i + J)^2, \quad \text{Eq. 3}$$

696 where  $(x_i, y_i, z_i)$  are the lens boundary points and A-J are coefficients for the general quadric  
 697 surface equation (Fig. 4c). After fitting, we found the center of the lens ellipsoid  $(x, y, z)$  by  
 698 solving the following equation.

$$699 \quad - \begin{bmatrix} A & D & E \\ D & B & F \\ E & F & C \end{bmatrix} \begin{bmatrix} x \\ y \\ z \end{bmatrix} = \begin{bmatrix} G \\ H \\ I \end{bmatrix}. \quad \text{Eq. 4}$$

700 We determined the optical axis of the eye by using principal component analysis<sup>56</sup> of the  
 701 coordinates for all segmented voxels corresponding to the anterior chamber. The calculated  
 702 principal components are orthogonal vectors, with the vector aligning most closely to the z-axis  
 703 of the reconstructed volume being the direction of the optical axis of the eye. We approximated  
 704 the anterior hyaloid membrane as the plane passing through the center of the ellipsoid with a  
 705 normal vector the same as the optical axis of the eye (Fig. 4d).

706           Finally, we updated the boundaries of the lens and outer surface of the posterior chamber  
707 (Fig. 4e) and applied a k-means-based volumetric segmentation on the full volumetric  
708 reconstruction<sup>57</sup>. We updated the posterior chamber segmentation using the newly segmented  
709 posterior chamber outer boundary, the lens boundary, and the plane approximating the anterior  
710 hyaloid membrane, as highlighted by the blue regions in Fig. 4f.

711 **Supplemental Figures**

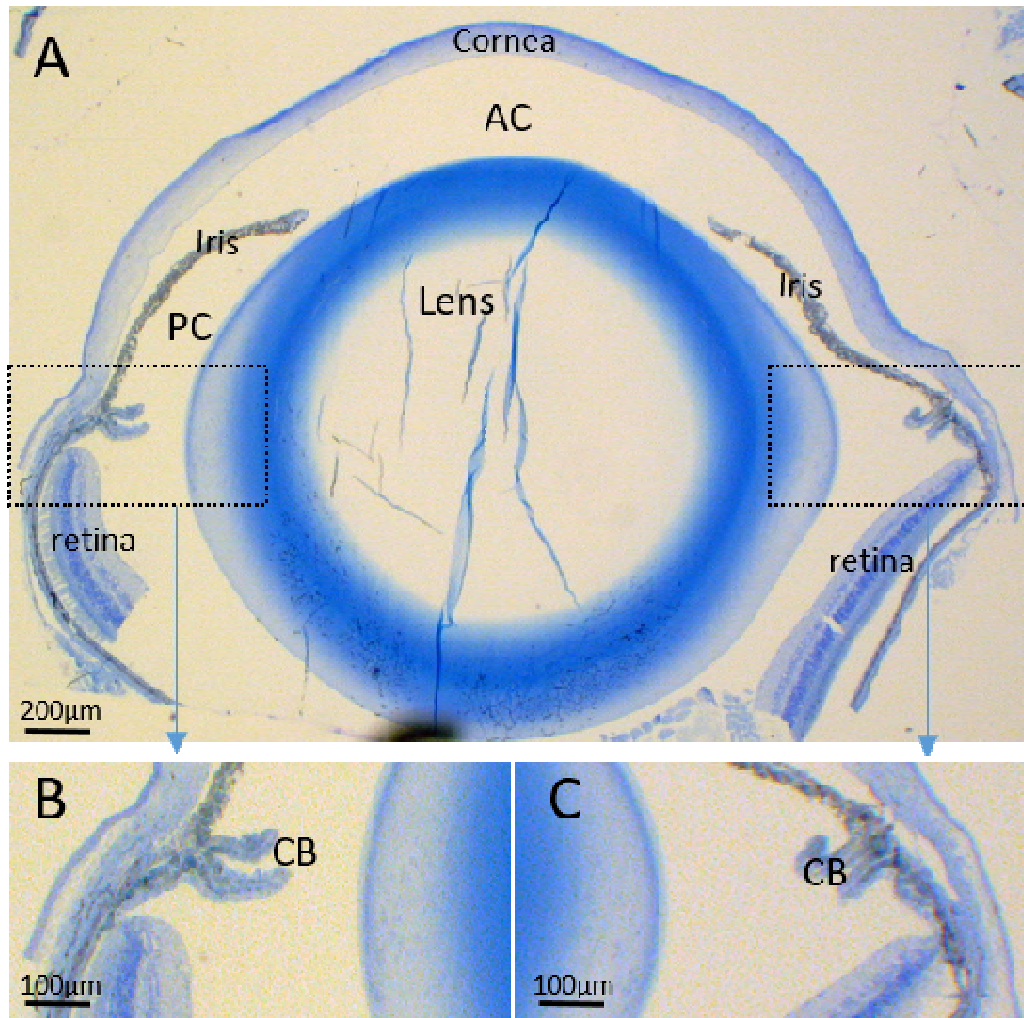

712  
713 **Supplemental Figure S1:** A) Histologic cross-section of a mouse eye from a 3-month-old  
714 female C57BL/6J wild-type mouse. Although distortion of the globe is evident due to histologic  
715 preparation, it is evident that the lens equator coincides approximately with the posterior margin  
716 of the ciliary body and the anterior termination of the retina. B) and C) show zoomed-in views of  
717 limbal area showing the left and right sides of the CB and anterior edges of retina. AC: anterior  
718 chamber, PC: posterior chamber, CB: ciliary body.

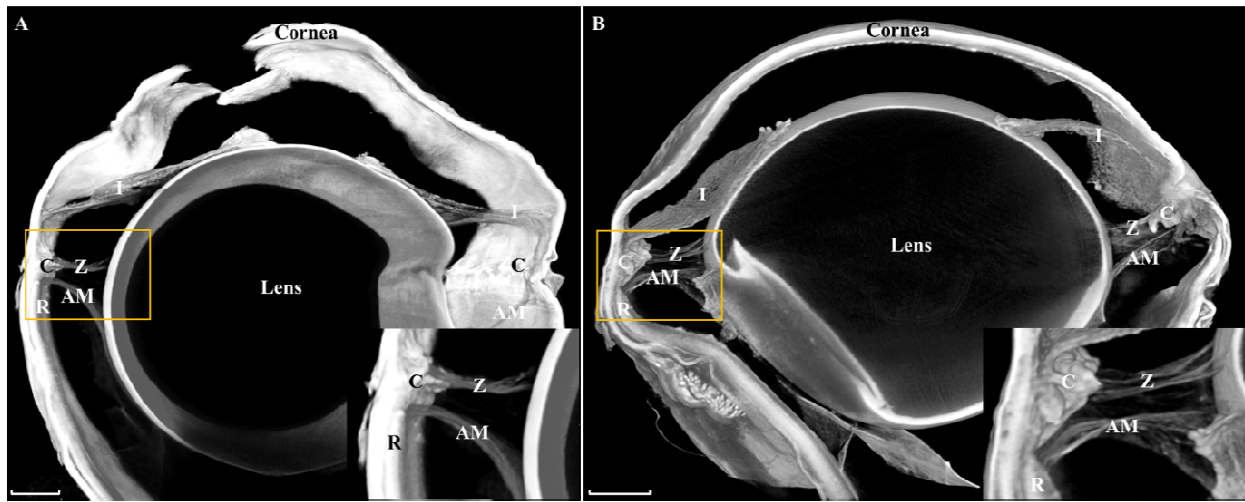

719

720 **Supplemental Figure S2:** Digital reconstructions from 3-dimensional micro-CT images of an  
721 eye from a 13-month-old DBA/2J female mouse (A) and a 1.5-month-old C57BL/6J female  
722 mouse (B). Scan resolutions are 0.87  $\mu\text{m}$  and 0.75  $\mu\text{m}$ , respectively. In (A), a corneal window  
723 was created to facilitate contrast agent penetration. The far side of the eye has been digitally  
724 removed to better visualize the structures of interest. Zonules are seen stretching from the ciliary  
725 processes to the lens. The peripheral edge of the anterior hyaloid membrane extends to the  
726 anterior boundary of the retina. The yellow boxes outline the areas of the insets. AM = Anterior  
727 Hyaloid Membrane, C = Ciliary Body, I = Iris, R = Retina, Z = Zonules, Scale bars = 250  $\mu\text{m}$ .
